# Supplementary material for: Beyond Pressure Gradients: The Effects of Intervention on Heart Power in Aortic Coarctation
Source: PLoS One. 2017 Jan 12;12(1):e0168487. doi: 10.1371/journal.pone.0168487 (PMC5231370; doi:10.1371/journal.pone.0168487)
Supplement: S3 Table — (XLS) [file pone.0168487.s005.xls]

## Sheet: Sheet1
anonymized_study_no	Sex	bicuspid	s_pevious_balloon_angioplasty	s_prestented	s_aortic_presurgery	age	weight	lenght	BSA	BMI	pre_RR_rU_SYS	pre_RR_rU_DIA	pre_RR_lU_SYS	pre_RR_lU_DIA	pre_RR_rL_SYS	pre_RR_rL_DIA	pre_RR_lL_SYS	pre_RR_lL_DIA	sysHTN_pre	post_RR_rU_SYS	post_RR_rU_DIA	post_RR_lU_SYS	post_RR_lU_DIA	post_RR_rL_SYS	post_RR_rL_DIA	post_RR_lL_SYS	post_RR_lL_DIA	sysHTN_post	s_heartwork	hp_HR_from_MRIpre	hp_CSpre	hp_COpre	hp_CIpre	hp_LV_p_minpre	hp_LV_p_maxpre	hp_Cuffpmaxpre	hp_Cuff_pminpre	hp_dpvalve_preANDpost	hp_Cuff_calcLV_syspre	hp_Cuff_calcLV_pmeansyspre	hp_wall_thickpre	hp_diameterpre	hp_Wall_stresspre	hp_Wall_stress_CUFFpre	hp_Volume_Myopre	hp_Int_Workpre	hp_Int_Power_CUFFpre	hp_MAPcuffpre	hp_Ext_Powerpre
1	1	0	0	1	1	60	74	174	1.89121	24.4418	171	79	172	82	187	81	185	76	1	159	90	169	82	179	70	180	91	1	1	88.89	0.13	6.03	3.19	6.73	119.25	172	82	0	172	155.06	15.54	25.77	6.59	9.51	134.18	0.88	9.59	112	1.5
2	1	0	0	0	0	45	110	171	2.28583	37.6184	148	77	150	79	116	58	140	49	1	162	70	162	94	145	82	159	77	1	1	75	0.16	7.12	3.11	16.75	132.34	150	79	10.35	160.35	146.7	19.39	26.71	6.08	7.36	174.9	1.06	7.95	103	1.63
3	2	1	1	0	0	14	48	146	1.39523	22.5183	153	57	130	65	121	49	107	55	1	147	69	145	68	135	61	142	67	1	1	80	0.23	5.55	3.98	18	121.55	130	65	7.43	137.43	125.08	19.85	24.79	5.06	5.72	182	0.92	4.45	87	1.07
4	1	0	0	0	1	12	31	142	1.10579	15.3739	144	55	144	55	106	52	106	46	1	123	48	98	44	105	57	104	57	1	1	82.76	0.19	4.43	4.01	6.52	127.8	144	55	14.09	158.09	141.86	14.63	18.29	5.32	6.59	72.65	0.39	2.55	85	0.84
5	1	1	1	1	0	21	73	188	1.95249	20.6541	140	62	109	61	114	50	109	42	1	141	60	108	53	146	61	134	66	1	1	46.15	0.12	5.04	2.58	19.08	105.29	109	61	25.83	134.83	125.45	12.81	38.34	10.5	13.45	143.17	1.5	16.6	77	0.86
6	1	0	1	1	0	19	60	170	1.68325	20.7612	134	53	120	51	119	53	124	53	0	136	60	113	55	101	55	104	56	0	1	41.38	0.12	4.47	2.66	15.47	121.74	120	51	12.05	132.05	119.3	12.18	40.78	13.58	14.73	139.91	1.9	16.9	74	0.73
7	1	0	1	0	1	14	45	145	1.34629	21.4031	118	50	101	55	114	66	112	62	0	110	48	90	47	107	52	112	50	0	1	85.71	0.14	5.66	4.2	14.88	136.77	101	55	45.87	146.87	137.95	11.25	12.95	5.25	5.63	79.18	0.42	3.3	70	0.88
8	2	0	0	0	0	11	33	133	1.10416	18.6557	138	62	143	68	105	63	96	68	1	100	51	109	64	127	57	136	48	0	1	61.54	0.24	3.52	3.19	10.84	122.59	143	68	0	143	128.89	10.79	24.72	9.36	10.92	53.11	0.5	2.38	93	0.73
9	1	0	1	1	0	19	74	190	1.97625	20.4986	141	63	120	63	123	64	127	72	1	124	51	117	49	100	51	100	55	0	1	50	0.31	4.75	2.4	13.09	108.9	120	63	3.57	123.57	112.62	14.89	30.89	7.53	8.54	163.13	1.23	4.55	82	0.87
10	2	0	1	1	1	18	42	149	1.31846	18.9181	131	62	128	76	120	65	120	65	0	135	76	129	59	111	59	119	60	0	1	64.86	0.29	3.99	3.03	11.83	149.52	128	76	19.93	147.93	137.57	10.44	25.83	12.33	12.2	86.97	1.07	3.71	93	0.82
11	1	1	1	1	0	47	78	175	1.94722	25.4694	116	51	105	49	84	47	79	48	0	140	72	135	70	123	68	126	67	1	1	66.6	0.14	4.59	2.35	3	96.9	105	49	0	105	94.5	16.95	28.521	5.43	5.89	225.47	1.23	9.69	68	0.69
12	2	1	1	1	1	26	60	170	1.68325	20.7612	132	70	100	68	132	61	102	60	0	113	65	77	57	94	58	94	63	0	1	80	0.15	6.07	3.61	13.2	121.8	100	68	3.8	103.8	97	11.64	28.8951	10.08	8.59	94.9	0.96	5.36	115	1.55
13	1	0	0	0	0	12	38.2	134	1.19243	21.2742	154	120	156	122	112	89	105	89	1	129	86	126	70	123	65	115	65	1	1	88.89	0.27	5.04	4.23	3.81	126.14	156	122	0.6	156.6	148.38	16.42	29.17	7.47	9.27	103.7	0.77	3.59	79	0.88
14	1	0	1	1	0	17	76	169	1.88886	26.6097	158	81	159	68	137	71	137	71	1	144	71	143	66	156	79	148	72	1	1	88.89	0.12	5.34	2.83	15.2	132.66	159	68	9.56	168.56	151.73	15.43	28.93	8.29	10.53	133.22	1.1	12.09	133	1.58
15	1	0	1	0	0	11	24.5	133	0.951388	13.8504	92	65	128	72	111	64	138	78	1	88	62	127	68	82	59	109	63	0	1	90.91	0.13	4.32	4.54	11.2	120.97	128	72	17.47	145.47	134.51	12.82	20.41	6.42	7.72	70.14	0.45	4.3	98	0.94
16	1	0	0	0	0	12	31	156	1.15902	12.7383	133	69	111	61	88	55	83	56	1	125	66	110	52	97	58	97	58	1	1	76.92	0.1	4.52	3.9	9.83	124.34	111	61	9.54	120.54	110.82	11.01	29.49	11.1	10.76	80.15	0.89	8.29	91	0.91
17	1	1	0	0	0	7	24.7	125	0.926088	15.808	137	80	120	66	96	67	96	67	1	125	77	117	67	133	77	133	77	1	1	90.91	0.12	5.19	5.6	7.62	128.5	120	66	8.14	128.14	117.64	10.11	28.34	12	11.97	57.9	0.7	5.97	78	0.9
18	1	1	0	0	1	28	65	180	1.80278	20.0617	120	66	114	66	113	67	112	65	0	144	80	133	80	144	79	148	79	1	1	73	0.16	6.7	3.72	5	121	114	66	17	131	121.52	11.44	41.9881	14.8	16.02	162.89	2.41	16.31	84	1.25
19	1	0	0	0	0	19	83	183	2.05406	24.7843	155	92	154	95	97	67	109	71	1	139	82	128	78	154	84	147	76	0	1	83.3	0.11	7.62	3.72	2.4	150.8	154	95	19.8	173.8	161.87	14.56	31.2767	10.8	12.44	155.94	1.68	17.64	82	1.39
20	1	1	1	0	1	21	84	180	2.04939	25.9259	153	72	119	69	138	50	99	51	1	140	60	113	61	118	65	110	59	1	1	79	0.15	9.1	4.44	16	121	119	69	14	133	123.12	15.32	29.4498	7.75	8.52	95.9	0.74	5.45	86	1.74
[truncated: 39 more columns]
